# Supplementary material for: Theoretical insight into the photophysical properties of six heteroleptic Ir(III) phosphorescent complexes bearing ppy-type ligands
Source: Royal Society of Chemistry journal article supplement (doi:10.1039/c9pp00218a), 2019-10-01
Supplement: c9pp00218a1.pdf [file c9pp00218a1.pdf]

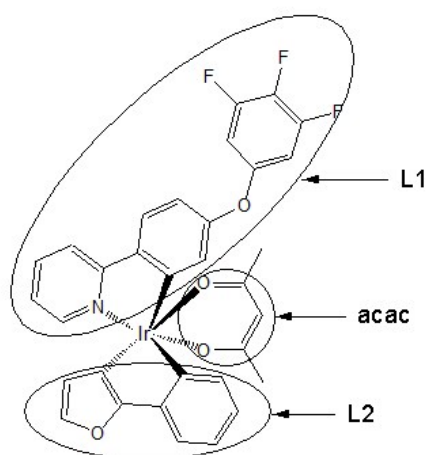

**Fig. S1** The names for different ligands in complexes **1–6** (taking complex **1** as an example).

**Table S1** Frontier molecular orbital energies (eV) and compositions (%) in the ground state for complex **1**. (Ir, L1, L2 and acac denote the iridium atom and corresponding ligands presented in Figure S1.)

| MO                               | Energy | Compositions |    |    |      | Assignment              |
|----------------------------------|--------|--------------|----|----|------|-------------------------|
|                                  |        | Ir           | L1 | L2 | acac |                         |
| L+10                             | 1.03   | 59           | 25 | 9  | 8    | d*(Ir)+ $\pi^*$ (L1)    |
| L+9                              | 0.89   | 37           | 39 | 21 | 4    | d*(Ir)+ $\pi^*$ (L1+L2) |
| L+8                              | 0.82   | 11           | 85 | 4  | 1    | d*(Ir)+ $\pi^*$ (L1)    |
| L+7                              | 0.12   | 6            | 92 | 1  | 1    | $\pi^*$ (L1)            |
| L+6                              | -0.24  | 0            | 99 | 1  | 0    | $\pi^*$ (L1)            |
| L+5                              | -0.50  | 0            | 98 | 1  | 0    | $\pi^*$ (L1)            |
| L+4                              | -0.83  | 2            | 8  | 89 | 1    | $\pi^*$ (L2)            |
| L+3                              | -0.97  | 2            | 2  | 3  | 93   | $\pi^*$ (acac)          |
| L+2                              | -1.05  | 2            | 91 | 5  | 2    | $\pi^*$ (L1)            |
| L+1                              | -1.46  | 5            | 1  | 92 | 1    | $\pi^*$ (L2)            |
| L                                | -1.61  | 4            | 94 | 2  | 1    | $\pi^*$ (L1)            |
| HOMO–LUMO energy gap ( 3.90 eV ) |        |              |    |    |      |                         |
| H                                | -5.51  | 33           | 14 | 50 | 3    | d(Ir)+ $\pi$ (L1+L2)    |
| H-1                              | -6.07  | 36           | 12 | 7  | 45   | d(Ir)+ $\pi$ (L1+acac)  |
| H-2                              | -6.26  | 6            | 50 | 33 | 10   | $\pi$ (L1+L2+acac)      |
| H-3                              | -6.52  | 19           | 60 | 16 | 5    | d(Ir)+ $\pi$ (L1+L2)    |
| H-4                              | -6.62  | 66           | 20 | 10 | 5    | d(Ir)+ $\pi$ (L1+L2)    |
| H-5                              | -7.02  | 30           | 11 | 9  | 49   | d(Ir)+ $\pi$ (L1+acac)  |
| H-6                              | -7.16  | 7            | 72 | 10 | 11   | $\pi$ (L1+L2+acac)      |
| H-7                              | -7.36  | 6            | 45 | 12 | 37   | $\pi$ (L1+L2+acac)      |
| H-8                              | -7.48  | 2            | 40 | 28 | 30   | $\pi$ (L1+L2+acac)      |
| H-9                              | -7.64  | 0            | 97 | 3  | 0    | $\pi$ (L1)              |
| H-10                             | -8.10  | 6            | 13 | 40 | 41   | $\pi$ (L1+L2+acac)      |

**Table S2** Frontier molecular orbital energies (eV) and compositions (%) in the ground state for complex **2**. (Ir, L1, L2 and acac denote the iridium atom and corresponding ligands presented in Figure S1.)

| MO                               | Energy | Compositions |    |    |      | Assignment                |
|----------------------------------|--------|--------------|----|----|------|---------------------------|
|                                  |        | Ir           | L1 | L2 | acac |                           |
| L+10                             | 0.62   | 4            | 5  | 91 | 0    | d*(Ir)+ $\pi$ *(L1+L2)    |
| L+9                              | 0.60   | 16           | 9  | 73 | 2    | d*(Ir)+ $\pi$ *(L2)       |
| L+8                              | 0.21   | 2            | 96 | 2  | 0    | $\pi$ *(L1)               |
| L+7                              | 0.01   | 3            | 95 | 1  | 1    | $\pi$ *(L1)               |
| L+6                              | -0.42  | 1            | 99 | 0  | 0    | $\pi$ *(L1)               |
| L+5                              | -0.51  | 0            | 99 | 0  | 0    | $\pi$ *(L1)               |
| L+4                              | -0.95  | 2            | 6  | 80 | 11   | $\pi$ *(L2+acac)          |
| L+3                              | -1.00  | 1            | 1  | 12 | 85   | $\pi$ *(L2+acac)          |
| L+2                              | -1.16  | 2            | 91 | 6  | 1    | $\pi$ *(L1)               |
| L+1                              | -1.58  | 5            | 1  | 92 | 1    | $\pi$ *(L2)               |
| L                                | -1.86  | 3            | 95 | 1  | 1    | $\pi$ *(L1)               |
| HOMO–LUMO energy gap ( 3.76 eV ) |        |              |    |    |      |                           |
| H                                | -5.62  | 37           | 15 | 44 | 4    | d(Ir)+ $\pi$ (L1+L2)      |
| H-1                              | -6.12  | 36           | 5  | 5  | 53   | d(Ir)+ $\pi$ (acac)       |
| H-2                              | -6.40  | 3            | 69 | 28 | 1    | $\pi$ (L1+L2)             |
| H-3                              | -6.47  | 10           | 49 | 36 | 5    | d(Ir)+ $\pi$ (L1+L2)      |
| H-4                              | -6.66  | 63           | 22 | 10 | 5    | d(Ir)+ $\pi$ (L1+L2)      |
| H-5                              | -6.94  | 7            | 44 | 45 | 3    | $\pi$ (L1+L2)             |
| H-6                              | -7.02  | 24           | 29 | 9  | 39   | d(Ir)+ $\pi$ (L1+acac)    |
| H-7                              | -7.22  | 13           | 55 | 21 | 10   | d(Ir)+ $\pi$ (L1+L2+acac) |
| H-8                              | -7.39  | 3            | 14 | 13 | 70   | $\pi$ (L1+L2+acac)        |
| H-9                              | -7.58  | 0            | 98 | 1  | 0    | $\pi$ (L1)                |
| H-10                             | -8.00  | 10           | 30 | 19 | 41   | d(Ir)+ $\pi$ (L1+L2+acac) |

**Table S3** Frontier molecular orbital energies (eV) and compositions (%) in the ground state for complex **3**. (Ir, L1, L2 and acac denote the iridium atom and corresponding ligands presented in Figure S1.)

| MO                               | Energy | Compositions |    |    |      | Assignment                |
|----------------------------------|--------|--------------|----|----|------|---------------------------|
|                                  |        | Ir           | L1 | L2 | acac |                           |
| L+10                             | 0.52   | 3            | 9  | 88 | 0    | d*(Ir)+ $\pi$ *(L1+L2)    |
| L+9                              | 0.20   | 5            | 12 | 82 | 1    | $\pi$ *(L1+L2)            |
| L+8                              | 0.04   | 7            | 84 | 8  | 1    | $\pi$ *(L1)               |
| L+7                              | -0.01  | 1            | 97 | 1  | 0    | $\pi$ *(L1)               |
| L+6                              | -0.50  | 0            | 98 | 1  | 0    | $\pi$ *(L1)               |
| L+5                              | -0.55  | 0            | 99 | 1  | 0    | $\pi$ *(L1)               |
| L+4                              | -0.94  | 3            | 7  | 71 | 19   | $\pi$ *(L2+acac)          |
| L+3                              | -1.00  | 1            | 2  | 19 | 77   | $\pi$ *(L1+acac)          |
| L+2                              | -1.15  | 3            | 90 | 7  | 0    | $\pi$ *(L1)               |
| L+1                              | -1.62  | 5            | 2  | 91 | 1    | $\pi$ *(L2)               |
| L                                | -1.82  | 3            | 94 | 2  | 1    | $\pi$ *(L1)               |
| HOMO–LUMO energy gap ( 3.75 eV ) |        |              |    |    |      |                           |
| H                                | -5.57  | 36           | 15 | 45 | 4    | d(Ir)+ $\pi$ (L1+L2)      |
| H-1                              | -6.07  | 29           | 30 | 7  | 35   | d(Ir)+ $\pi$ (L1+acac)    |
| H-2                              | -6.19  | 8            | 71 | 2  | 19   | $\pi$ (L1+acac)           |
| H-3                              | -6.42  | 8            | 18 | 70 | 4    | $\pi$ (L1+L2)             |
| H-4                              | -6.62  | 61           | 19 | 15 | 5    | d(Ir)+ $\pi$ (L1+L2)      |
| H-5                              | -6.80  | 12           | 30 | 51 | 6    | d(Ir)+ $\pi$ (L1+L2)      |
| H-6                              | -7.03  | 28           | 22 | 9  | 40   | d(Ir)+ $\pi$ (L1+acac)    |
| H-7                              | -7.20  | 8            | 79 | 7  | 7    | $\pi$ (L1)                |
| H-8                              | -7.36  | 5            | 12 | 14 | 70   | $\pi$ (L1+L2+acac)        |
| H-9                              | -7.60  | 1            | 98 | 1  | 1    | $\pi$ (L1)                |
| H-10                             | -7.89  | 12           | 36 | 17 | 36   | d(Ir)+ $\pi$ (L1+L2+acac) |

**Table S4** Frontier molecular orbital energies (eV) and compositions (%) in the ground state for complex **4**. (Ir, L1, L2 and acac denote the iridium atom and corresponding ligands presented in Figure S1.)

| MO                               | Energy | Compositions |     |    |      | Assignment              |
|----------------------------------|--------|--------------|-----|----|------|-------------------------|
|                                  |        | Ir           | L1  | L2 | acac |                         |
| L+10                             | 0.52   | 2            | 7   | 91 | 0    | $\pi^*(L2)$             |
| L+9                              | 0.25   | 3            | 62  | 36 | 0    | $\pi^*(L1+L2)$          |
| L+8                              | 0.16   | 8            | 34  | 56 | 2    | $\pi^*(L1+L2)$          |
| L+7                              | -0.23  | 2            | 98  | 0  | 0    | $\pi^*(L1)$             |
| L+6                              | -0.58  | 0            | 100 | 0  | 0    | $\pi^*(L1)$             |
| L+5                              | -0.92  | 3            | 17  | 67 | 13   | $\pi^*(L1+L2+acac)$     |
| L+4                              | -0.97  | 1            | 4   | 11 | 83   | $\pi^*(L2+acac)$        |
| L+3                              | -1.05  | 2            | 83  | 15 | 0    | $\pi^*(L1+L2)$          |
| L+2                              | -1.11  | 1            | 94  | 4  | 1    | $\pi^*(L1)$             |
| L+1                              | -1.60  | 5            | 9   | 85 | 1    | $\pi^*(L2)$             |
| L                                | -1.69  | 4            | 87  | 9  | 1    | $\pi^*(L1)$             |
| HOMO–LUMO energy gap ( 3.86 eV ) |        |              |     |    |      |                         |
| H                                | -5.55  | 36           | 19  | 42 | 3    | $d(Ir)+\pi(L1+L2)$      |
| H-1                              | -6.07  | 29           | 25  | 9  | 37   | $d(Ir)+\pi(L1+acac)$    |
| H-2                              | -6.15  | 9            | 65  | 9  | 17   | $\pi(L1+acac)$          |
| H-3                              | -6.42  | 14           | 16  | 65 | 4    | $d(Ir)+\pi(L1+L2)$      |
| H-4                              | -6.64  | 66           | 15  | 14 | 5    | $d(Ir)+\pi(L1+L2)$      |
| H-5                              | -6.81  | 5            | 34  | 52 | 9    | $\pi(L1+L2)$            |
| H-6                              | -7.03  | 30           | 13  | 15 | 42   | $d(Ir)+\pi(L1+L2+acac)$ |
| H-7                              | -7.33  | 4            | 20  | 11 | 64   | $\pi(L1+L2+acac)$       |
| H-8                              | -7.37  | 3            | 90  | 1  | 7    | $\pi(L1+acac)$          |
| H-9                              | -7.61  | 0            | 100 | 0  | 0    | $\pi(L1)$               |
| H-10                             | -7.88  | 10           | 47  | 13 | 30   | $d(Ir)+\pi(L1+L2+acac)$ |

**Table S5** Frontier molecular orbital energies (eV) and compositions (%) in the ground state for complex **5**. (Ir, L1, L2 and acac denote the iridium atom and corresponding ligands presented in Figure S1.)

| MO                               | Energy | Compositions |    |    |      | Assignment                |
|----------------------------------|--------|--------------|----|----|------|---------------------------|
|                                  |        | Ir           | L1 | L2 | acac |                           |
| L+10                             | 0.44   | 10           | 86 | 4  | 1    | d*(Ir)+ $\pi$ *(L1)       |
| L+9                              | 0.18   | 6            | 12 | 82 | 1    | $\pi$ *(L1+L2)            |
| L+8                              | 0.03   | 6            | 86 | 8  | 1    | $\pi$ *(L1)               |
| L+7                              | -0.06  | 1            | 98 | 1  | 0    | $\pi$ *(L1)               |
| L+6                              | -0.40  | 1            | 99 | 0  | 0    | $\pi$ *(L1)               |
| L+5                              | -0.64  | 0            | 98 | 1  | 0    | $\pi$ *(L1)               |
| L+4                              | -0.95  | 3            | 6  | 74 | 17   | $\pi$ *(L2+acac)          |
| L+3                              | -1.01  | 1            | 2  | 17 | 80   | $\pi$ *(L2+acac)          |
| L+2                              | -1.18  | 3            | 91 | 6  | 0    | $\pi$ *(L1)               |
| L+1                              | -1.63  | 5            | 2  | 92 | 1    | $\pi$ *(L2)               |
| L                                | -1.87  | 3            | 95 | 2  | 1    | $\pi$ *(L1)               |
| HOMO–LUMO energy gap ( 3.73 eV ) |        |              |    |    |      |                           |
| H                                | -5.60  | 36           | 14 | 47 | 4    | d(Ir)+ $\pi$ (L1+L2)      |
| H-1                              | -6.12  | 36           | 8  | 6  | 50   | d(Ir)+ $\pi$ (acac)       |
| H-2                              | -6.35  | 1            | 91 | 2  | 5    | $\pi$ (L1)                |
| H-3                              | -6.43  | 8            | 21 | 68 | 4    | $\pi$ (L1+L2)             |
| H-4                              | -6.65  | 58           | 22 | 16 | 5    | d(Ir)+ $\pi$ (L1+L2)      |
| H-5                              | -6.81  | 15           | 30 | 50 | 5    | d(Ir)+ $\pi$ (L1+L2)      |
| H-6                              | -7.04  | 26           | 28 | 8  | 38   | d(Ir)+ $\pi$ (L1+acac)    |
| H-7                              | -7.20  | 12           | 69 | 9  | 10   | d(Ir)+ $\pi$ (L1+acac)    |
| H-8                              | -7.38  | 5            | 11 | 14 | 70   | $\pi$ (L1+L2+acac)        |
| H-9                              | -7.52  | 0            | 98 | 1  | 1    | $\pi$ (L1)                |
| H-10                             | -7.93  | 11           | 35 | 17 | 37   | d(Ir)+ $\pi$ (L1+L2+acac) |

**Table S6** Frontier molecular orbital energies (eV) and compositions (%) in the ground state for complex **6**. (Ir, L1, L2 and acac denote the iridium atom and corresponding ligands presented in Figure S1.)

| MO                               | Energy | Compositions |     |    |      | Assignment              |
|----------------------------------|--------|--------------|-----|----|------|-------------------------|
|                                  |        | Ir           | L1  | L2 | acac |                         |
| L+10                             | 0.48   | 2            | 48  | 49 | 0    | $\pi^*(L1+L2)$          |
| L+9                              | 0.20   | 5            | 16  | 78 | 1    | $\pi^*(L1+L2)$          |
| L+8                              | 0.08   | 7            | 80  | 12 | 1    | $\pi^*(L1+L2)$          |
| L+7                              | -0.42  | 1            | 99  | 0  | 0    | $\pi^*(L1)$             |
| L+6                              | -0.56  | 1            | 99  | 0  | 0    | $\pi^*(L1)$             |
| L+5                              | -0.93  | 3            | 12  | 71 | 14   | $\pi^*(L1+L2+acac)$     |
| L+4                              | -0.98  | 1            | 3   | 14 | 82   | $\pi^*(L2+acac)$        |
| L+3                              | -1.08  | 2            | 86  | 12 | 0    | $\pi^*(L1+L2)$          |
| L+2                              | -1.14  | 1            | 96  | 2  | 1    | $\pi^*(L1)$             |
| L+1                              | -1.61  | 5            | 4   | 90 | 1    | $\pi^*(L2)$             |
| L                                | -1.74  | 4            | 92  | 4  | 1    | $\pi^*(L1)$             |
| HOMO–LUMO energy gap ( 3.82 eV ) |        |              |     |    |      |                         |
| H                                | -5.56  | 36           | 17  | 43 | 3    | $d(Ir)+\pi(L1+L2)$      |
| H-1                              | -6.09  | 36           | 8   | 7  | 49   | $d(Ir)+\pi(acac)$       |
| H-2                              | -6.24  | 2            | 75  | 18 | 5    | $\pi(L1+L2)$            |
| H-3                              | -6.44  | 16           | 19  | 61 | 4    | $d(Ir)+\pi(L1+L2)$      |
| H-4                              | -6.66  | 64           | 16  | 15 | 4    | $d(Ir)+\pi(L1+L2)$      |
| H-5                              | -6.83  | 5            | 37  | 48 | 10   | $\pi(L1+L2+acac)$       |
| H-6                              | -7.03  | 29           | 15  | 15 | 41   | $d(Ir)+\pi(L1+L2+acac)$ |
| H-7                              | -7.35  | 4            | 20  | 12 | 64   | $\pi(L1+L2+acac)$       |
| H-8                              | -7.37  | 4            | 89  | 1  | 7    | $\pi(L1)$               |
| H-9                              | -7.52  | 0            | 100 | 0  | 0    | $\pi(L1)$               |
| H-10                             | -7.90  | 11           | 39  | 15 | 35   | $d(Ir)+\pi(L1+L2+acac)$ |

**Table S7** Selected calculated wavelength  $\lambda$ (nm), oscillator strength  $f$ , major contribution, transition characters, and the available experimental wavelengths (nm) for complexes **1–6**. (H and L indicate HOMO and LUMO, respectively.)

|                 | State           | $\lambda$ (nm)/E(eV) | $f$         | Configuration                      | Assignment                                 | Nature                             | Exptl <sup>a</sup> |     |
|-----------------|-----------------|----------------------|-------------|------------------------------------|--------------------------------------------|------------------------------------|--------------------|-----|
| <b>1</b>        | S <sub>1</sub>  | 414/2.99             | 0.0621      | H→L (90%)                          | d(Ir)+ $\pi$ (L1+L2)→ $\pi^*$ (L1)         | MLCT/LLCT/ILCT                     |                    |     |
|                 | S <sub>10</sub> | 305/4.05             | 0.1264      | H-2→L+1 (78%)                      | $\pi$ (L1+L2+acac)→ $\pi^*$ (L2)           | LLCT/ILCT                          |                    |     |
|                 | S <sub>14</sub> | 295/4.19             | 0.2577      | H-3→L (34%)                        | d(Ir)+ $\pi$ (L1+L2)→ $\pi^*$ (L1)         | MLCT/LLCT/ILCT                     |                    |     |
|                 |                 |                      |             | H-1→L+2 (32%)                      | d(Ir)+ $\pi$ (L1+acac)→ $\pi^*$ (L1)       | MLCT/LLCT/ILCT                     |                    |     |
|                 | S <sub>22</sub> | 267/4.62             | 0.1402      | H-4→L+3 (20%)                      | d(Ir)+ $\pi$ (L1+L2)→ $\pi^*$ (acac)       | MLCT/LLCT/ILCT                     |                    |     |
|                 |                 |                      |             | H-4→L+2 (18%)                      | d(Ir)+ $\pi$ (L1+L2)→ $\pi^*$ (L1)         | MLCT/LLCT/ILCT                     |                    |     |
|                 | S <sub>26</sub> | 263/4.70             | 0.1397      | H-2→L+4 (51%)                      | $\pi$ (L1+L2+acac)→ $\pi^*$ (L2)           | LLCT/ILCT                          |                    |     |
|                 |                 |                      |             | H→L+7 (16%)                        | d(Ir)+ $\pi$ (L1+L2)→ $\pi^*$ (L1)         | MLCT/LLCT/ILCT                     |                    |     |
|                 | S <sub>34</sub> | 251/4.93             | 0.1001      | H-6→L+1 (37%)                      | $\pi$ (L1+L2+acac)→ $\pi^*$ (L2)           | LLCT/ILCT                          |                    |     |
|                 |                 |                      |             | H-7→L+1 (17%)                      | $\pi$ (L1+L2+acac)→ $\pi^*$ (L2)           | LLCT/ILCT                          |                    |     |
|                 | S <sub>47</sub> | 234/5.28             | 0.1149      | H-5→L+3 (32%)                      | d(Ir)+ $\pi$ (L1+acac)→ $\pi^*$ (acac)     | MLCT/LLCT/ILCT                     |                    |     |
|                 |                 |                      |             | H-8→L+1 (18%)                      | $\pi$ (L1+L2+acac)→ $\pi^*$ (L2)           | LLCT/ILCT                          |                    |     |
|                 | <b>2</b>        | S <sub>1</sub>       | 434/2.85    | 0.0473                             | H→L (96%)                                  | d(Ir)+ $\pi$ (L1+L2)→ $\pi^*$ (L1) | MLCT/LLCT/ILCT     |     |
| S <sub>13</sub> |                 | 303/4.09             | 0.1132      | H-2→L+1 (41%)                      | $\pi$ (L1+L2)→ $\pi^*$ (L2)                | LLCT/ILCT                          |                    |     |
|                 |                 |                      |             | H-1→L+2 (19%)                      | d(Ir)+ $\pi$ (acac)→ $\pi^*$ (L1)          | MLCT/LLCT                          |                    |     |
| S <sub>17</sub> |                 | 287/4.31             | 0.2114      | H-5→L (61%)                        | $\pi$ (L1+L2)→ $\pi^*$ (L1)                | LLCT/ILCT                          |                    |     |
|                 |                 |                      |             | H-1→L+4 (10%)                      | d(Ir)+ $\pi$ (acac)→ $\pi^*$ (L2+acac)     | MLCT/LLCT/ILCT                     |                    |     |
| S <sub>26</sub> |                 | 267/4.63             | 0.3298      | H-7→L (30%)                        | d(Ir)+ $\pi$ (L1+L2+acac)→ $\pi^*$ (L1)    | MLCT/LLCT/ILCT                     |                    |     |
|                 |                 |                      |             | H-2→L+2 (21%)                      | $\pi$ (L1+L2)→ $\pi^*$ (L1)                | LLCT/ILCT                          |                    |     |
| S <sub>30</sub> |                 | 262/4.72             | 0.1015      | H-2→L+4 (20%)                      | $\pi$ (L1+L2)→ $\pi^*$ (L2+acac)           | LLCT/ILCT                          |                    |     |
|                 |                 |                      |             | H-2→L+3 (11%)                      | $\pi$ (L1+L2)→ $\pi^*$ (L2+acac)           | LLCT/ILCT                          |                    |     |
| S <sub>41</sub> |                 | 247/5.01             | 0.1572      | H-5→L+2 (30%)                      | $\pi$ (L1+L2)→ $\pi^*$ (L1)                | LLCT/ILCT                          |                    |     |
|                 |                 |                      |             | H-6→L+2 (26%)                      | d(Ir)+ $\pi$ (L1+acac)→ $\pi^*$ (L1)       | MLCT/LLCT/ILCT                     |                    |     |
| <b>3</b>        |                 | S <sub>1</sub>       | 434/2.85    | 0.0552                             | H→L (95%)                                  | d(Ir)+ $\pi$ (L1+L2)→ $\pi^*$ (L1) | MLCT/LLCT/ILCT     | 418 |
|                 |                 | S <sub>7</sub>       | 343/3.61    | 0.1841                             | H-2→L (84%)                                | $\pi$ (L1+acac)→ $\pi^*$ (L1)      | LLCT/ILCT          |     |
|                 | S <sub>13</sub> | 307/4.03             | 0.1604      | H-3→L+1 (64%)                      | $\pi$ (L1+L2)→ $\pi^*$ (L2)                | LLCT/ILCT                          |                    |     |
|                 |                 |                      |             | H-1→L+2 (11%)                      | d(Ir)+ $\pi$ (L1+acac)→ $\pi^*$ (L1)       | MLCT/LLCT/ILCT                     |                    |     |
|                 | S <sub>33</sub> | 264/4.68             | 0.1305      | H-2→L+6 (20%)                      | $\pi$ (L1+acac)→ $\pi^*$ (L1)              | LLCT/ILCT                          |                    |     |
| H-8→L (19%)     |                 |                      |             | $\pi$ (L1+L2+acac)→ $\pi^*$ (L1)   | LLCT/ILCT                                  |                                    |                    |     |
| H-3→L+4 (17%)   |                 |                      |             | $\pi$ (L1+L2)→ $\pi^*$ (L2+acac)   | LLCT/ILCT                                  |                                    |                    |     |
| <b>4</b>        | S <sub>1</sub>  | 421/2.94             | 0.0824      | H→L (88%)                          | d(Ir)+ $\pi$ (L1+L2)→ $\pi^*$ (L1)         | MLCT/LLCT/ILCT                     |                    |     |
|                 | S <sub>7</sub>  | 332/3.72             | 0.2531      | H-2→L (58%)                        | $\pi$ (L1+acac)→ $\pi^*$ (L1)              | LLCT/ILCT                          |                    |     |
|                 |                 |                      |             | H→L+5 (14%)                        | d(Ir)+ $\pi$ (L1+L2)→ $\pi^*$ (L1+L2+acac) | MLCT/LLCT/ILCT                     |                    |     |
|                 | S <sub>8</sub>  | 332/3.72             | 0.1037      | H→L+5 (57%)                        | d(Ir)+ $\pi$ (L1+L2)→ $\pi^*$ (L1+L2+acac) | MLCT/LLCT/ILCT                     |                    |     |
|                 |                 |                      |             | H-2→L (14%)                        | $\pi$ (L1+acac)→ $\pi^*$ (L1)              | LLCT/ILCT                          |                    |     |
|                 | S <sub>9</sub>  | 321/3.85             | 0.1572      | H-3→L (33%)                        | d(Ir)+ $\pi$ (L1+L2)→ $\pi^*$ (L1)         | MLCT/LLCT/ILCT                     |                    |     |
|                 |                 |                      |             | H-4→L (28%)                        | d(Ir)+ $\pi$ (L1+L2)→ $\pi^*$ (L1)         | MLCT/LLCT/ILCT                     |                    |     |
| S <sub>13</sub> | 306/4.04        | 0.1114               | H-3→L (48%) | d(Ir)+ $\pi$ (L1+L2)→ $\pi^*$ (L1) | MLCT/LLCT/ILCT                             |                                    |                    |     |
|                 |                 |                      |             | H-4→L (39%)                        | d(Ir)+ $\pi$ (L1+L2)→ $\pi^*$ (L1)         | MLCT/LLCT/ILCT                     |                    |     |



|          |                 |          |        |                                |                                                   |                                  |
|----------|-----------------|----------|--------|--------------------------------|---------------------------------------------------|----------------------------------|
|          | S <sub>14</sub> | 303/4.08 | 0.0965 | H-3→L+1 (44%)                  | d(Ir)+π(L1+L2)→π*(L2)                             | MLCT/LLCT/ILCT                   |
| <b>5</b> | S <sub>1</sub>  | 436/2.83 | 0.0475 | H→L (96%)                      | d(Ir)+π(L1+L2)→π*(L1)                             | MLCT/LLCT/ILCT                   |
|          | S <sub>11</sub> | 315/3.92 | 0.0995 | H-4→L+1 (52%)<br>H-3→L+1 (24%) | d(Ir)+π(L1+L2)→π*(L2)<br>π(L1+L2)→π*(L2)          | MLCT/LLCT/ILCT<br>LLCT/ILCT      |
|          | S <sub>12</sub> | 306/4.03 | 0.1553 | H-3→L+1 (54%)<br>H-1→L+2 (16%) | π(L1+L2)→π*(L2)<br>d(Ir)+π(acac)→π*(L1)           | LLCT/ILCT<br>MLCT/LLCT           |
|          | S <sub>16</sub> | 295/4.19 | 0.0915 | H-5→L (78%)                    | d(Ir)+π(L1+L2)→π*(L1)                             | MLCT/LLCT/ILCT                   |
|          | S <sub>29</sub> | 266/4.64 | 0.2364 | H-7→L (25%)<br>H-4→L+2 (14%)   | d(Ir)+π(L1+acac)→π*(L1)<br>d(Ir)+π(L1+L2)→π*(L1)  | MLCT/LLCT/ILCT<br>MLCT/LLCT/ILCT |
|          | S <sub>30</sub> | 265/4.67 | 0.1428 | H-8→L (41%)<br>H-8→L+3 (14%)   | π(L1+L2+acac)→π*(L1)<br>π(L1+L2+acac)→π*(L2+acac) | LLCT/ILCT<br>LLCT/ILCT           |
|          | S <sub>46</sub> | 246/5.03 | 0.1265 | H-6→L+2 (42%)<br>H-9→L (27%)   | d(Ir)+π(L1+acac)→π*(L1)<br>π(L1)→π*(L1)           | MLCT/LLCT/ILCT<br>ILCT           |
| <b>6</b> | S <sub>1</sub>  | 425/2.91 | 0.0703 | H→L (91%)                      | d(Ir)+π(L1+L2)→π*(L1)                             | MLCT/LLCT/ILCT                   |
|          | S <sub>8</sub>  | 331/3.73 | 0.1870 | H-2→L (58%)<br>H→L+5 (14%)     | π(L1+L2)→π*(L1)<br>d(Ir)+π(L1+L2)→π*(L1+L2+acac)  | LLCT/ILCT<br>MLCT/LLCT/ILCT      |
|          | S <sub>9</sub>  | 322/3.84 | 0.1321 | H-3→L (36%)<br>H-4→L (27%)     | d(Ir)+π(L1+L2)→π*(L1)<br>d(Ir)+π(L1+L2)→π*(L1)    | MLCT/LLCT/ILCT<br>MLCT/LLCT/ILCT |
|          | S <sub>12</sub> | 313/3.95 | 0.1294 | H-2→L+1 (81%)<br>H-3→L+1 (11%) | π(L1+L2)→π*(L2)<br>d(Ir)+π(L1+L2)→π*(L2)          | LLCT/ILCT<br>MLCT/LLCT/ILCT      |
|          | S <sub>22</sub> | 281/4.41 | 0.1001 | H→L+6 (40%)<br>H-5→L (12%)     | d(Ir)+π(L1+L2)→π*(L1)<br>π(L1+L2+acac)→π*(L1)     | MLCT/LLCT/ILCT<br>LLCT/ILCT      |
|          | S <sub>45</sub> | 251/4.93 | 0.1481 | H-8→L (27%)<br>H→L+8 (14%)     | π(L1)→π*(L1)<br>d(Ir)+π(L1+L2)→π*(L1+L2)          | ILCT<br>MLCT/LLCT/ILCT           |

<sup>a</sup> Ref. 24

**Table S8** Partial frontier molecular orbital composition (%) of complexes **1–6** in the triplet excited states. (H and L indicate HOMO and LUMO, respectively)

|          | MO  | Energy/eV | Composition (%) |    |    |      | Assignment         |
|----------|-----|-----------|-----------------|----|----|------|--------------------|
|          |     |           | Ir              | L1 | L2 | acac |                    |
| <b>1</b> | L+1 | -1.59     | 4               | 72 | 22 | 1    | $\pi^*(L1+L2)$     |
|          | L   | -1.70     | 5               | 23 | 71 | 1    | $\pi^*(L1+L2)$     |
|          | H   | -5.33     | 25              | 8  | 65 | 2    | $d(Ir)+\pi(L1)$    |
| <b>2</b> | L   | -2.16     | 4               | 94 | 2  | 1    | $\pi^*(L1)$        |
|          | H   | -5.51     | 36              | 19 | 41 | 4    | $d(Ir)+\pi(L1+L2)$ |
|          | H-2 | -6.39     | 3               | 54 | 40 | 3    | $\pi(L1+L2)$       |
| <b>3</b> | L+1 | -1.80     | 5               | 63 | 31 | 1    | $\pi^*(L1+L2)$     |
|          | L   | -1.91     | 4               | 33 | 62 | 1    | $\pi^*(L1+L2)$     |
|          | H   | -5.42     | 27              | 9  | 62 | 2    | $d(Ir)+\pi(L2)$    |
| <b>4</b> | L   | -1.89     | 6               | 8  | 86 | 1    | $\pi^*(L2)$        |
|          | H   | -5.40     | 28              | 10 | 60 | 2    | $d(Ir)+\pi(L1+L2)$ |
| <b>5</b> | L+1 | -1.61     | 6               | 2  | 91 | 1    | $\pi^*(L2)$        |
|          | L   | -2.19     | 3               | 94 | 2  | 1    | $\pi^*(L1)$        |
|          | H   | -5.47     | 34              | 16 | 45 | 5    | $d(Ir)+\pi(L1+L2)$ |
|          | H-2 | -6.40     | 2               | 73 | 18 | 6    | $\pi(L1+L2)$       |
| <b>6</b> | L   | -2.14     | 4               | 94 | 2  | 1    | $\pi^*(L1)$        |
|          | H   | -5.46     | 35              | 18 | 43 | 4    | $d(Ir)+\pi(L1+L2)$ |
|          | H-2 | -6.39     | 4               | 31 | 59 | 6    | $\pi(L1+L2)$       |
